# Supplementary material
Source: publisher figshare collection journal article supplement (https://frontiersin.figshare.com/ndownloader/files/20077139)
Supplement: Supplementary file 1 [file 20077139]

## Sheet: Zircon age data
Zircon age data from the Gassum Formation in the Skagerrak
Olivarius et al. 2019, Front. Earth Sci. 7:312
		CONCENTRATIONSa						RATIOS								AGES						CORR.f	CONCORDANCE
Sample	Analysis	U [ppm]	2 s	Th [ppm]	2 s	Pb [ppm]	2 s	U/Tha	207Pb/235Ub	2 sd	206Pb/238Ub	2 sd	rhoc	207Pb/206Pbe	2 sd	207Pb/235Ub	2 sd	206Pb/238Ub	2 sd	207Pb/206Pbe	2 sd	common Pb	Wetherill	Tera-Wasserburg
J-1, 1734-1740 m	#008	514	34	158	16	1026	71	3.17	4.36	0.12	0.3031	0.0088	0.96084	0.10466	0.00086	1704	24	1706	43	1708	15		100.117	99.8829
J-1, 1734-1740 m	#010	724	47	74	13	166	23	10.1	0.7419	0.0096	0.0907	0.0027	0.50556	0.0595	0.0017	563.5	5.6	560	16	586	61		99.3789	95.5631
J-1, 1734-1740 m	#012	1439	94	200	33	760	140	7.4	2.06	0.1	0.193	0.0092	0.96813	0.0779	0.001	1136	34	1138	50	1143	26		100.176	99.5626
J-1, 1734-1740 m	#014	1000	130	225	31	880	120	4.53	1.683	0.044	0.1681	0.0043	0.95913	0.07269	0.00063	1002	17	1001	24	1005	18		99.9002	99.602
J-1, 1734-1740 m	#023	321	25	57.6	6	260	32	5.31	2.248	0.042	0.2014	0.0061	0.82429	0.081	0.0014	1196	13	1183	33	1222	34		98.913	96.8085
J-1, 1734-1740 m	#024	512	93	108	15	530	150	4.51	2.152	0.047	0.1977	0.0042	0.58098	0.07942	0.00057	1166	15	1163	23	1183	14		99.7427	98.3094
J-1, 1734-1740 m	#025	1004	72	187	21	687	82	5.19	1.769	0.031	0.1655	0.0041	0.98921	0.07763	0.00062	1034	11	987	23	1137	16		95.4545	86.8074
J-1, 1734-1740 m	#027	648	29	154	11	635	51	4.1	1.833	0.069	0.1742	0.0057	0.98539	0.07621	0.00052	1057	25	1035	31	1101	14		97.9186	94.0054
J-1, 1734-1740 m	#033	1048	61	198	44	750	140	5.23	1.685	0.049	0.1653	0.0039	0.645	0.07301	0.00058	1002	19	986	21	1014	16		98.4032	97.2387
J-1, 1734-1740 m	#034	847	89	124	25	334	13	7.5	1.384	0.03	0.1403	0.0025	0.4319	0.0711	0.0013	882	13	847	14	961	38		96.0317	88.1374
J-1, 1734-1740 m	#035	99.1	1.7	43.2	1.3	170.9	7.2	2.33	1.582	0.046	0.1537	0.0041	0.5304	0.0754	0.0011	963	18	922	23	1077	30		95.7425	85.6082
J-1, 1734-1740 m	#036	1088	84	206	19	719	90	5.24	1.981	0.038	0.1849	0.0033	0.91373	0.0776	0.00069	1109	13	1094	18	1136	18		98.6474	96.3028
J-1, 1734-1740 m	#037	114.9	9.1	47	11	228	43	2.42	2.349	0.045	0.2055	0.0065	0.46136	0.0815	0.0028	1227	13	1205	35	1231	67		98.207	97.8879
J-1, 1734-1740 m	#038	310	24	72.1	6.1	417	46	4.23	4.24	0.14	0.2938	0.0075	0.94093	0.1046	0.0011	1681	27	1660	37	1707	20		98.7507	97.2466
J-1, 1734-1740 m	#039	308	30	108.3	9.8	617	70	2.8	3.755	0.091	0.2721	0.0049	0.94944	0.09993	0.00096	1583	20	1552	25	1623	18		98.0417	95.6254
J-1, 1734-1740 m	#046	246	41	28	3.5	110	11	9	2.122	0.025	0.1948	0.0028	0.33364	0.0788	0.0012	1155.9	8	1147	15	1167	31		99.23	98.2862
J-1, 1734-1740 m	#048	900	160	147	36	700	180	6.1	2.494	0.077	0.212	0.0048	0.73739	0.0851	0.0019	1270	22	1240	25	1317	44		97.6378	94.1534
J-1, 1734-1740 m	#053	780	110	95	27	338	76	8.3	3.427	0.081	0.2529	0.0054	0.49271	0.0982	0.0023	1510	19	1453	28	1588	45		96.2252	91.4987
J-1, 1734-1740 m	#059	512	72	102	17	413	59	5.29	2.33	0.14	0.2026	0.0078	0.85285	0.0833	0.0029	1221	43	1189	42	1275	66		97.3792	93.2549
J-1, 1734-1740 m	#061	762	57	177	28	720	100	4.58	1.983	0.098	0.1831	0.0049	0.81227	0.0786	0.0026	1109	33	1084	27	1160	66		97.7457	93.4483
J-1, 1734-1740 m	#062	1537	48	297	29	1353	84	5.49	2.547	0.04	0.2188	0.004	0.99112	0.08419	0.00037	1285	12	1275	21	1296.9	8.5		99.2218	98.3114
J-1, 1734-1740 m	#065	621	29	94.1	2.9	326.2	9.1	6.92	1.481	0.032	0.1502	0.0018	0.39843	0.0714	0.002	923	13	902.1	9.9	968	58		97.7356	93.1921
J-1, 1734-1740 m	#066	960	330	207	66	1130	360	4.76	3.166	0.051	0.2489	0.0038	0.80667	0.09203	0.00097	1449	12	1433	19	1468	20		98.8958	97.6158
J-1, 1734-1740 m	#072	661	30	113.2	4.2	607	26	5.97	3.003	0.061	0.2392	0.0045	0.76465	0.0909	0.0011	1408	15	1382	23	1444	23		98.1534	95.7064
J-1, 1734-1740 m	#074	2040	160	467	46	880	140	4.56	1.233	0.054	0.1292	0.0057	0.99705	0.0692	0.00024	815	24	783	32	904.7	7.2		96.0736	86.548
J-1, 1734-1740 m	#076	281	29	51.4	4.5	278	29	5.67	2.98	0.15	0.2278	0.0033	0.19035	0.095	0.0046	1403	38	1323	18	1525	91		94.2979	86.7541
J-1, 1734-1740 m	#085	677.8	9.5	151.9	3.8	771	37	4.415	2.473	0.027	0.219	0.0055	0.89419	0.08123	0.00089	1264.1	7.8	1277	29	1227	22		101.02	104.075
J-1, 1734-1740 m	#086	269	24	64.1	9	301	35	4.14	2.193	0.041	0.1999	0.0034	0.69008	0.08016	0.00056	1179	13	1175	18	1201	14		99.6607	97.8351
J-1, 1734-1740 m	#087	1250	150	301	29	1120	160	4.245	1.859	0.018	0.1747	0.001	0.70341	0.0771	0.00095	1066.6	6.5	1037.7	5.6	1123	25		97.2905	92.4043
J-1, 1734-1740 m	#088	330	16	73.6	3.5	408	35	4.51	2.94	0.14	0.2402	0.0077	0.87784	0.0888	0.0016	1391	36	1387	40	1400	35		99.7124	99.0714
J-1, 1734-1740 m	#090	3910	300	91.6	7.4	331	38	41.6	1.696	0.036	0.1741	0.0039	0.79978	0.0707	0.001	1007	14	1035	22	949	30		102.781	109.062
J-1, 1734-1740 m	#091	544	37	157	20	665	90	3.54	1.863	0.051	0.1809	0.0058	0.92447	0.07535	0.0006	1068	18	1072	32	1078	16		100.375	99.4434
J-1, 1734-1740 m	#092	86	5.9	62.8	4.5	265.9	9.7	1.373	1.765	0.034	0.1726	0.0023	0.45216	0.0745	0.0013	1032	12	1026	13	1055	36		99.4186	97.2512
J-1, 1734-1740 m	#098	271	20	65.9	1.8	253.2	9	4.13	1.484	0.025	0.1542	0.0019	0.83844	0.07	0.00077	923	10	924	11	928	22		100.108	99.569
J-1, 1734-1740 m	#099	197	11	31.9	1.7	180	8.4	6.226	3.09	0.11	0.2419	0.0062	0.9214	0.0931	0.0016	1431	27	1396	32	1489	32		97.5542	93.7542
J-1, 1734-1740 m	#104	663	13	137.7	1.4	597	30	4.849	2.025	0.035	0.1873	0.0046	0.86385	0.07872	0.00075	1124	12	1106	25	1165	19		98.3986	94.9356
J-1, 1734-1740 m	#105	861	28	216	12	1029	44	4.05	2.115	0.025	0.1951	0.0033	0.72777	0.07921	0.00089	1153.7	8.2	1149	18	1177	22		99.5926	97.6211
J-1, 1734-1740 m	#111	2200	62	28.12	0.78	118.6	6	77.9	1.706	0.012	0.1725	0.0017	0.88237	0.07187	0.00077	1010.8	4.6	1025.9	9.3	982	22		101.494	104.47
J-1, 1734-1740 m	#112	1051	60	86.4	2.2	524	11	12.02	2.941	0.095	0.2385	0.0051	0.88485	0.0896	0.0017	1392	25	1379	26	1417	35		99.0661	97.3183
J-1, 1734-1740 m	#113	188.5	9.4	36.4	1.9	147.9	5.1	5.18	1.746	0.032	0.1709	0.0018	0.44792	0.0746	0.0013	1025	12	1017	10	1055	34		99.2195	96.3981
J-1, 1734-1740 m	#114	94.1	4.9	34.9	2.7	132.8	8.3	2.69	1.485	0.035	0.152	0.004	0.61134	0.0711	0.0015	924	14	912	23	958	42		98.7013	95.1983
J-1, 1734-1740 m	#115	94.6	3.1	34.66	0.77	223.6	7.3	2.659	3.641	0.05	0.2742	0.0039	0.83754	0.09588	0.00094	1558	11	1562	20	1545	18		100.257	101.1
J-1, 1734-1740 m	#117	308	15	85	2.7	307.3	9.7	3.644	1.482	0.017	0.1533	0.0024	0.81856	0.07037	0.00068	922.7	6.9	920	14	939	20		99.7074	97.9766
J-1, 1734-1740 m	#118	158	14	43.4	4.1	159	11	3.595	1.431	0.031	0.149	0.0026	0.82078	0.0704	0.0011	906	15	895	15	938	31		98.7859	95.4158
J-1, 1734-1740 m	#129	2510	160	289	82	940	190	9.7	1.565	0.042	0.1599	0.0041	0.93726	0.07129	0.00072	956	17	956	23	965	20		100	99.0674
J-1, 1734-1740 m	#130	1900	1000	440	260	1460	790	4.6	2.151	0.073	0.1988	0.0068	0.65613	0.0791	0.0025	1165	24	1169	37	1173	62		100.343	99.659
J-1, 1734-1740 m	#131	332	18	81.3	6.7	422	55	4.04	3.87	0.18	0.2774	0.0058	0.85672	0.1014	0.0029	1606	37	1578	29	1649	53		98.2565	95.6944
J-1, 1734-1740 m	#150	2330	140	480	110	622	97	5.5	1.626	0.042	0.1645	0.0057	0.93389	0.07216	0.00094	980	16	982	32	990	26		100.204	99.1919
J-1, 1734-1740 m	#152	650	230	134	41	540	160	5.05	2	0.11	0.183	0.011	0.92212	0.07975	0.00083	1117	37	1082	59	1191	21		96.8666	90.848
J-1, 1734-1740 m	#156	2040	130	516	73	1640	200	3.91	1.605	0.036	0.16	0.0036	0.96201	0.07207	0.00046	972	14	964	23	988	13		99.177	97.5709
J-1, 1734-1740 m	#157	567	32	179.3	7.5	1032	66	3.08	3.68	0.15	0.2726	0.0098	0.9718	0.0983	0.0012	1566	33	1554	50	1593	23		99.2337	97.5518
J-1, 1734-1740 m	#049	610	55	188	13	1164	69	3.182	5.83	0.12	0.3366	0.009	0.67497	0.1255	0.0025	1950	17	1870	43	2035	34	X	95.8974	91.8919
J-1, 1734-1740 m	#050	1460	180	352	40	1590	180	4.02	2.3	0.12	0.175	0.01	0.95568	0.0945	0.0016	1210	37	1042	56	1517	32	X	86.1157	68.6882
J-1, 1734-1740 m	#052	540	140	163	65	940	360	3.89	3.22	0.11	0.2407	0.0068	0.80569	0.0973	0.0017	1460	28	1390	35	1571	33	X	95.2055	88.4787
J-1, 1734-1740 m	#064	2470	240	483	55	2090	320	5.4	1.554	0.081	0.1506	0.0078	0.7633	0.0749	0.0029	952	32	904	43	1065	77	X	94.958	84.8826
J-1, 1734-1740 m	#073	880	210	205	38	1140	230	4.48	2.25	0.13	0.201	0.011	0.82926	0.0814	0.0026	1196	40	1179	60	1230	63	X	98.5786	95.8537
J-1, 1734-1740 m	#103	1660	110	682	40	1670	230	2.444	1.26	0.13	0.129	0.01	0.91813	0.071	0.003	827	59	785	60	955	84	X	94.9214	82.199
J-1, 1734-1740 m	#116	1027	93	328	68	787	51	3.23	1.378	0.053	0.1384	0.0012	0.64402	0.0724	0.0024	879	23	835.4	6.9	996	69	X	95.0398	83.8755
J-1, 1734-1740 m	#125	1980	120	467	46	1650	150	4.2	1.846	0.063	0.1753	0.0052	0.91602	0.07672	0.00081	1062	23	1041	29	1114	21	X	98.0226	93.447
J-1, 1734-1740 m	#142	5280	140	740	140	1600	190	7.5	1.227	0.048	0.1334	0.0035	0.91629	0.06728	0.0009	812	22	807	20	846	28	X	99.3842	95.3901
J-1, 1734-1740 m	#143	1302	78	338	31	745	26	3.84	1.381	0.073	0.1297	0.0072	0.97516	0.07736	0.0008	880	31	786	41	1130	21	X	89.3182	69.5575
J-1, 1734-1740 m	#144	2140	160	630	180	1570	450	3.52	1.256	0.056	0.1322	0.0054	0.93664	0.06952	0.00091	826	25	800	31	914	27	X	96.8523	87.5274
J-1, 1789-1795 m	#163	187	13	37.7	2.8	267	14	5.226	4.275	0.051	0.3024	0.0049	0.9154	0.10287	0.00081	1688.5	9.8	1703	24	1676	15		100.859	101.611
J-1, 1789-1795 m	#164	311	22	62.4	3.1	386	22	5.429	3.506	0.041	0.2713	0.0037	0.78452	0.09325	0.00076	1528.4	9.2	1547	19	1493	15		101.217	103.617
J-1, 1789-1795 m	#165	980	110	110	11	450	45	9.6	1.738	0.05	0.1772	0.0078	0.87632	0.0713	0.0012	1023	19	1052	43	967	34		102.835	108.79
J-1, 1789-1795 m	#166	980	170	490	230	1900	800	2.72	1.742	0.042	0.1736	0.0039	0.92097	0.07283	0.0008	1024	15	1032	21	1009	22		100.781	102.279
J-1, 1789-1795 m	#170	357	31	66.5	4.9	151	10	5.74	0.7549	0.0074	0.0923	0.0014	0.62698	0.05948	0.0008	571	4.3	568.9	8.4	584	29		99.6322	97.4144
J-1, 1789-1795 m	#176	91.5	6.5	14.26	0.69	68.7	5.1	6.31	2.243	0.045	0.2046	0.003	0.5452	0.0792	0.0015	1194	14	1200	16	1176	37		100.503	102.041
J-1, 1789-1795 m	#177	150	15	38.6	2.9	252	18	3.75	3.786	0.091	0.2802	0.0055	0.93477	0.09744	0.00083	1589	19	1592	28	1575	16		100.189	101.079
J-1, 1789-1795 m	#178	564	54	130	18	570	110	4.29	2.31	0.17	0.2079	0.0076	0.87604	0.0809	0.0033	1215	49	1217	41	1217	77		100.165	100
J-1, 1789-1795 m	#179	3360	220	62.2	4.9	169	10	54.7	1.0125	0.0082	0.10873	0.00097	0.86209	0.06753	0.00044	710.1	4.1	665.4	5.7	854	13		93.7051	77.9157
J-1, 1789-1795 m	#180	1070	58	410	23	2620	200	2.599	4.37	0.19	0.2984	0.0098	0.56802	0.1065	0.0037	1705	36	1683	48	1740	62		98.7097	96.7241
J-1, 1789-1795 m	#189	730	110	181	15	1175	67	4.08	4.21	0.12	0.2994	0.0082	0.92974	0.1019	0.0011	1675	24	1688	41	1659	20		100.776	101.748
J-1, 1789-1795 m	#190	1640	130	406	70	780	170	4.03	1.188	0.035	0.1177	0.0024	0.722	0.0732	0.0015	795	16	718	14	1019	42		90.3145	70.4612
J-1, 1789-1795 m	#191	99	5.4	24.3	1.2	156	17	3.927	3.28	0.089	0.2509	0.0063	0.82108	0.0946	0.002	1476	21	1443	33	1519	41		97.7642	94.9967
J-1, 1789-1795 m	#193	339	21	79	17	500	100	4.28	3.94	0.1	0.2845	0.006	0.98186	0.10068	0.00075	1622	21	1614	30	1637	14		99.5068	98.595
J-1, 1789-1795 m	#196	239.8	5.4	42.2	2	215	11	5.57	2.396	0.053	0.213	0.0031	0.82715	0.08182	0.00067	1241	16	1245	16	1241	16		100.322	100.322
J-1, 1789-1795 m	#202	501	14	136.3	8.8	985	33	3.68	4.02	0.055	0.2874	0.0046	0.9411	0.10131	0.00073	1638	11	1629	23	1648	13		99.4505	98.8471
J-1, 1789-1795 m	#204	1077	42	116.6	8.8	445	58	9.21	1.62	0.17	0.1524	0.0094	0.6901	0.0772	0.0056	976	65	915	53	1120	140		93.75	81.6964
J-1, 1789-1795 m	#205	923	40	208	16	1180	79	4.39	3.218	0.037	0.2525	0.0038	0.88142	0.09236	0.00071	1461.5	8.9	1451	20	1474	15		99.2816	98.4396
J-1, 1789-1795 m	#207	434	13	173.6	9.4	656	32	2.48	1.739	0.039	0.1691	0.0035	0.67251	0.0746	0.0013	1023	14	1007	19	1058	36		98.436	95.1796
J-1, 1789-1795 m	#208	144	5.6	33.5	2.3	154	15	4.28	2.241	0.05	0.2023	0.0042	0.48882	0.0803	0.0017	1194	16	1187	22	1219	32		99.4137	97.3749
J-1, 1789-1795 m	#217	158.3	4	26.4	1.3	126.6	4.4	6.09	2.177	0.044	0.2021	0.0044	0.8769	0.07848	0.00081	1174	14	1187	24	1159	21		101.107	102.416
J-1, 1789-1795 m	#218	312	12	156	13	1003	93	2.05	4.082	0.049	0.2899	0.0067	0.89654	0.10069	0.00079	1650.6	9.9	1652	28	1637	14		100.085	100.916
J-1, 1789-1795 m	#219	202.1	9.7	57.5	4.6	390	36	3.64	4.043	0.061	0.2919	0.0037	0.75427	0.1007	0.001	1643	12	1651	19	1637	19		100.487	100.855
J-1, 1789-1795 m	#221	133.8	3.6	24	1.5	106.6	5	6	2.147	0.06	0.1991	0.0046	0.61288	0.0782	0.0018	1164	19	1170	25	1149	45		100.515	101.828
J-1, 1789-1795 m	#222	164	15	44.7	1	199	8	3.81	1.885	0.033	0.1811	0.0022	0.58991	0.07498	0.00086	1075	12	1073	12	1067	23		99.814	100.562
J-1, 1789-1795 m	#229	453	16	73.7	5.7	195	18	6.21	0.958	0.021	0.1121	0.0025	0.79589	0.06234	0.00094	685.3	9.8	685	14	685	32		99.9562	100
J-1, 1789-1795 m	#230	900	36	427	15	1092	15	2.111	0.908	0.029	0.1031	0.0018	0.58242	0.0637	0.0017	656	15	632	11	731	55		96.3415	86.4569
J-1, 1789-1795 m	#231	870	71	180	15	415	24	4.894	0.729	0.012	0.0901	0.0014	0.83785	0.05865	0.00057	555.8	7.3	556.1	8.2	554	21		100.054	100.379
J-1, 1789-1795 m	#234	372	14	134.5	7	965	27	2.891	4.445	0.058	0.3056	0.0024	0.65903	0.10463	0.00091	1721	11	1719	12	1708	16		99.8838	100.644
J-1, 1789-1795 m	#235	368	27	60	12	260	53	6.55	1.535	0.047	0.1566	0.004	0.81832	0.0709	0.0013	944	19	938	22	953	37		99.3644	98.426
J-1, 1789-1795 m	#241	239	18	108	19	690	110	2.31	3.727	0.077	0.2637	0.0045	0.86149	0.1023	0.0011	1577	16	1508	23	1665	19		95.6246	90.5706
J-1, 1789-1795 m	#242	401	15	50.9	2.4	290	10	7.88	2.702	0.034	0.2284	0.0027	0.7678	0.08645	0.00086	1328.7	9.3	1326	14	1348	19		99.7968	98.368
J-1, 1789-1795 m	#243	1318	76	202.4	7.8	921	30	6.45	1.964	0.023	0.1789	0.0016	0.56257	0.0794	0.00073	1103.1	7.8	1061.2	8.8	1182	18		96.2016	89.78
J-1, 1789-1795 m	#244	2030	120	650	120	690	110	3.41	0.3396	0.0058	0.04574	0.00069	0.6788	0.05403	0.00066	296.8	4.4	288.3	4.2	371	28		97.1361	77.7089
J-1, 1789-1795 m	#246	282	48	84	22	466	96	3.62	2.746	0.054	0.2253	0.0032	0.9208	0.0885	0.0011	1341	15	1310	17	1393	23		97.6883	94.0416
J-1, 1789-1795 m	#248	524	20	104.8	3.3	778	25	4.99	5.301	0.069	0.3359	0.0044	0.87176	0.11414	0.00073	1869	11	1867	21	1866	12		99.893	100.054
J-1, 1789-1795 m	#254	428	60	105	33	760	240	4.24	5.52	0.11	0.3232	0.0071	0.68941	0.1237	0.0017	1904	16	1805	35	2010	25		94.8004	89.801
J-1, 1789-1795 m	#255	749	89	90.4	4.5	443	16	7.62	1.817	0.023	0.1775	0.0033	0.95449	0.07427	0.00081	1051.7	8.3	1053	18	1049	22		100.124	100.381
J-1, 1789-1795 m	#259	585	27	226.9	8.5	1372	45	2.497	3.914	0.07	0.2827	0.0055	0.90408	0.0999	0.00084	1616	14	1605	27	1622	16		99.3193	98.9519
J-1, 1789-1795 m	#260	243.2	4.1	70.9	2.2	452	13	3.255	3.684	0.038	0.2686	0.0023	0.84585	0.0996	0.00083	1567.8	8.2	1533	12	1616	16		97.7803	94.8639
J-1, 1789-1795 m	#261	52.6	5.2	15.4	2.5	105	15	3.38	4.044	0.066	0.2889	0.0037	0.48298	0.1009	0.0016	1643	13	1636	19	1640	30		99.574	99.7561
J-1, 1789-1795 m	#267	1815	40	78	38	430	210	33	1.929	0.043	0.1548	0.0031	0.93095	0.0903	0.0012	1091	15	928	17	1431	26		85.0596	64.8498
J-1, 1789-1795 m	#268	606	31	128	9.3	715	49	4.86	3.691	0.038	0.2705	0.0043	0.98456	0.0993	0.0012	1569.4	8.3	1544	22	1610	22		98.3815	95.9006
J-1, 1789-1795 m	#269	394	23	158	16	959	80	2.59	3.185	0.068	0.2475	0.0043	0.83372	0.0934	0.001	1453	17	1426	22	1495	21		98.1418	95.3846
J-1, 1789-1795 m	#271	243	49	53.3	2.3	360	12	4.67	3.87	0.1	0.2863	0.0086	0.93679	0.0981	0.0012	1607	22	1623	43	1588	23		100.996	102.204
J-1, 1789-1795 m	#272	815	19	154	13	325	26	5.58	0.702	0.014	0.0866	0.0017	0.87369	0.05898	0.00059	539.8	8.2	535	10	566	22		99.1108	94.523
J-1, 1789-1795 m	#273	367.2	2	63.7	2.8	516	25	6.03	5.588	0.072	0.3379	0.0053	0.74414	0.12021	0.00098	1914	11	1877	25	1959	15		98.0669	95.8142
J-1, 1789-1795 m	#274	379	37	89	11	426	47	4.47	2.187	0.045	0.2013	0.0025	0.73711	0.0788	0.001	1177	14	1182	13	1167	25		100.425	101.285
J-1, 1789-1795 m	#280	343	44	144	18	920	110	2.437	3.955	0.07	0.2834	0.0047	0.92375	0.1013	0.0014	1625	14	1609	23	1647	25		99.0154	97.6928
J-1, 1789-1795 m	#281	845	28	111	3.9	655	29	7.73	3.163	0.058	0.2485	0.0052	0.98135	0.09245	0.00079	1448	14	1431	27	1477	16		98.826	96.8856
J-1, 1789-1795 m	#282	140	26	67	18	440	96	2.23	3.64	0.14	0.271	0.012	0.95273	0.0975	0.0013	1556	30	1545	60	1576	25		99.2931	98.033
J-1, 1789-1795 m	#283	264	9.5	66.3	1.7	340.7	6.4	4.027	2.277	0.027	0.2041	0.0022	0.59214	0.08089	0.00076	1205	8.5	1197	12	1218	18		99.3361	98.2759
J-1, 1789-1795 m	#284	487	28	214.4	7.9	1437	52	2.28	3.773	0.057	0.2763	0.0045	0.86226	0.09925	0.00081	1587	12	1573	23	1610	15		99.1178	97.7019
J-1, 1789-1795 m	#295	365	53	102	12	710	64	3.368	3.67	0.11	0.2738	0.0048	0.76991	0.0977	0.0016	1564	23	1560	24	1579	30		99.7442	98.7967
J-1, 1789-1795 m	#296	484	19	159.4	9.2	1106	24	2.902	4.38	0.16	0.3035	0.0084	0.91904	0.1049	0.0015	1708	31	1708	42	1712	27		100	99.7664
J-1, 1789-1795 m	#297	655	87	71.8	7.1	638	82	8.85	7.33	0.25	0.386	0.011	0.86885	0.1379	0.0023	2152	30	2105	51	2200	28		97.816	95.6818
J-1, 1789-1795 m	#299	401	7.7	71.57	0.9	354	12	5.483	2.198	0.024	0.1971	0.0021	0.88421	0.081	0.00041	1180.5	7.8	1160	11	1221.3	9.8		98.2634	94.9808
J-1, 1789-1795 m	#300	272.9	8.7	59.5	2	295	16	4.52	2.291	0.052	0.2059	0.0048	0.88607	0.08071	0.00088	1209	16	1207	25	1214	21		99.8346	99.4234
J-1, 1789-1795 m	#306	510	100	202	45	1260	230	2.6	3.98	0.18	0.2838	0.0098	0.92531	0.1019	0.002	1628	37	1610	49	1659	36		98.8943	97.0464
J-1, 1789-1795 m	#307	2131	82	276.7	7.5	1336	26	7.89	2.245	0.04	0.2025	0.005	0.85258	0.08091	0.00086	1195	12	1189	27	1219	21		99.4979	97.539
J-1, 1789-1795 m	#310	1799	62	286	54	670	120	6.8	1.529	0.029	0.1535	0.0027	0.84862	0.07259	0.00078	942	12	920	15	1002	22		97.6645	91.8164
J-1, 1789-1795 m	#311	225.5	8.1	98.6	2.8	108.9	3.2	2.372	0.324	0.014	0.04441	0.00089	0.12108	0.0529	0.0021	284	11	280.1	5.5	316	95		98.6268	88.6392
J-1, 1789-1795 m	#312	678	44	134.3	6	1130	35	5.164	5.96	0.11	0.3547	0.0058	0.9336	0.12156	0.00033	1970	15	1957	28	1979.3	4.8		99.3401	98.8733
J-1, 1789-1795 m	#313	234	40	88	17	317	51	2.79	1.475	0.033	0.1523	0.0027	0.47489	0.0709	0.0016	920	13	914	15	954	47		99.3478	95.8071
J-1, 1789-1795 m	#319	337	37	122.5	7.1	801	37	2.77	4.173	0.055	0.2924	0.0021	0.64452	0.10288	0.0007	1669	11	1654	10	1677	13		99.1013	98.6285
J-1, 1789-1795 m	#320	548	13	145	3.8	888	26	3.836	3.726	0.076	0.2687	0.0046	0.68982	0.1005	0.0015	1577	16	1534	23	1633	27		97.2733	93.9375
J-1, 1789-1795 m	#321	255	15	62	6.2	278	28	4.22	1.73	0.067	0.1744	0.004	0.85402	0.0714	0.0013	1019	25	1036	22	968	36		101.668	107.025
J-1, 1789-1795 m	#322	552	72	162	40	760	170	3.87	2.211	0.051	0.2011	0.0043	0.96785	0.07992	0.00041	1184	16	1181	23	1195	10		99.7466	98.8285
J-1, 1789-1795 m	#323	151	14	97.6	5.7	517	22	1.576	2.732	0.032	0.2314	0.0022	0.25566	0.0857	0.0011	1337.1	8.7	1342	11	1330	24		100.366	100.902
J-1, 1789-1795 m	#324	213.3	9.6	109.4	7.3	700	44	1.969	3.737	0.038	0.2751	0.0024	0.8041	0.09886	0.00073	1579.3	8.2	1566	12	1603	14		99.1579	97.6918
J-1, 1789-1795 m	#337	2680	230	511	55	1980	150	5.34	2.122	0.038	0.1959	0.004	0.96048	0.07866	0.00058	1156	12	1153	22	1163	15		99.7405	99.1402
J-1, 1789-1795 m	#168	690	110	103	24	780	210	7.32	3.452	0.065	0.2638	0.0051	0.48657	0.0954	0.002	1516	15	1509	26	1536	39	X	99.5383	98.2422
J-1, 1789-1795 m	#181	1533	56	215	35	2580	590	7.42	2.51	0.11	0.1992	0.007	0.87526	0.0916	0.0018	1273	31	1171	38	1458	37	X	91.9874	80.3155
J-1, 1789-1795 m	#215	1190	570	770	470	3400	2000	1.84	2.478	0.052	0.2178	0.0073	0.69209	0.0827	0.0021	1265	15	1270	39	1261	49	X	100.395	100.714
J-1, 1789-1795 m	#228	1540	360	340	120	1010	260	4.79	1.34	0.049	0.1363	0.0048	0.65956	0.0713	0.0021	863	21	823	27	965	61	X	95.365	85.285
J-1, 1789-1795 m	#245	877	52	189.7	9.6	749	93	4.45	2.798	0.043	0.2199	0.0032	0.82688	0.094	0.0016	1355	11	1282	17	1508	32	X	94.6125	85.0133
J-1, 1789-1795 m	#256	485	35	93.7	5.7	840	110	4.913	1.949	0.076	0.182	0.0025	0.39283	0.0774	0.0031	1097	26	1078	14	1123	79	X	98.268	95.9929
J-1, 1789-1795 m	#258	529	14	109.3	4.6	557	32	4.65	4.098	0.087	0.2861	0.0091	0.89114	0.1052	0.0015	1664	25	1622	46	1718	26	X	97.476	94.4121
J-1, 1789-1795 m	#285	3850	100	90	29	329	18	45	0.78	0.038	0.0851	0.0035	0.96623	0.0669	0.0019	585	22	526	21	835	60	X	89.9145	62.994
J-1, 1789-1795 m	#294	730	140	67	17	109	15	11.1	0.669	0.09	0.0793	0.0046	0.65026	0.0612	0.0064	518	54	492	27	630	220	X	94.9807	78.0952
J-1, 1789-1795 m	#298	1631	18	268	41	1000	180	6.11	2.035	0.068	0.1755	0.005	0.89883	0.08367	0.00066	1127	23	1042	27	1285	15	X	92.4579	81.0895
J-1, 1789-1795 m	#309	636	90	174	22	890	160	3.66	2.12	0.073	0.1898	0.0038	0.4089	0.0799	0.0035	1155	24	1120	20	1189	86	X	96.9697	94.1968
J-1, 1789-1795 m	#325	2710	460	1510	350	4520	840	1.794	1.483	0.069	0.1536	0.0065	0.92671	0.0702	0.0011	923	28	921	36	934	32	X	99.7833	98.6081
J-1, 1789-1795 m	#326	2620	730	119	19	334	45	21.8	1.264	0.04	0.1361	0.0033	0.67087	0.0677	0.0015	830	18	823	19	858	48	X	99.1566	95.9207
J-1, 1789-1795 m	#333	2500	110	455	29	2120	120	5.65	1.909	0.051	0.1702	0.0049	0.92334	0.08151	0.00074	1084	18	1013	27	1234	18	X	93.4502	82.0908
J-1, 1789-1795 m	#334	1017	95	154	34	690	130	7.5	2.115	0.089	0.1896	0.0047	0.20414	0.0813	0.0035	1153	29	1119	26	1224	86	X	97.0512	91.4216
J-1, 1789-1795 m	#335	4230	330	319	36	804	75	13.9	0.8	0.022	0.0915	0.0018	0.45664	0.0637	0.0015	596	13	564	11	732	50	X	94.6309	77.0492
J-1, 1789-1795 m	#336	403	16	113.6	8.5	645	30	3.62	3.42	0.14	0.2516	0.0053	0.81404	0.0988	0.0034	1508	31	1447	27	1599	65	X	95.9549	90.4941
J-1, 1789-1795 m	#338	833	40	64	11	579	72	13.5	2.971	0.093	0.2216	0.0092	0.92812	0.0978	0.0017	1400	24	1290	48	1583	34	X	92.1429	81.4908
J-1, 1789-1795 m	#339	1064	85	382	14	1867	42	2.81	2.79	0.11	0.2189	0.0052	0.90541	0.0927	0.0019	1352	29	1276	28	1481	39	X	94.3787	86.158
Felicia-1, 1555-1565 m	#216	134	18	56.7	6.3	384	56	2.279	4.623	0.061	0.3173	0.0045	0.94576	0.10564	0.00083	1753	11	1776	22	1725	14		101.312	102.957
Felicia-1, 1555-1565 m	#219	150	12	42.5	4.5	194	22	3.56	2.206	0.053	0.2041	0.004	0.80136	0.0789	0.0012	1182	17	1197	22	1168	30		101.269	102.483
Felicia-1, 1555-1565 m	#220	780	110	184	34	700	110	5	1.781	0.029	0.1748	0.0029	0.91809	0.07395	0.00043	1038	11	1039	16	1040	12		100.096	99.9038
Felicia-1, 1555-1565 m	#222	404	12	330	290	1700	1300	2.5	3.504	0.086	0.26	0.0027	0.90915	0.0976	0.0015	1528	19	1490	14	1579	29		97.5131	94.3635
Felicia-1, 1555-1565 m	#228	330	16	124	18	719	55	2.67	3.78	0.14	0.278	0.011	0.96035	0.0986	0.0022	1588	30	1580	54	1597	42		99.4962	98.9355
Felicia-1, 1555-1565 m	#229	804	54	201	11	1014	26	3.976	2.761	0.052	0.2327	0.0039	0.93784	0.086	0.0011	1345	14	1349	20	1338	25		100.297	100.822
Felicia-1, 1555-1565 m	#232	380	32	63.4	6.5	312	19	6.06	2.49	0.037	0.2184	0.0034	0.85727	0.08266	0.00089	1269	11	1273	18	1261	21		100.315	100.952
Felicia-1, 1555-1565 m	#233	225	22	70.5	6.1	493	33	3.2	4.46	0.13	0.3143	0.0077	0.96489	0.10256	0.00085	1723	24	1761	38	1675	17		102.205	105.134
Felicia-1, 1555-1565 m	#235	719	91	235	27	1360	140	3.044	3.435	0.064	0.2611	0.0014	0.19896	0.0953	0.0015	1512	15	1495.6	7.1	1534	29		98.9153	97.4967
Felicia-1, 1555-1565 m	#243	283	47	84	11	535	39	3.34	3.95	0.077	0.288	0.0095	0.94704	0.0983	0.0011	1624	16	1631	48	1592	20		100.431	102.45
Felicia-1, 1555-1565 m	#245	240	18	57.3	4.8	236	16	4.184	1.908	0.046	0.1845	0.0035	0.89159	0.07493	0.00094	1083	16	1091	19	1066	25		100.739	102.345
Felicia-1, 1555-1565 m	#247	73.3	3.8	12.4	0.36	66.5	3.4	5.88	2.875	0.062	0.2433	0.0056	0.9059	0.08565	0.0002	1375	16	1404	29	1330.2	4.5		102.109	105.548
Felicia-1, 1555-1565 m	#254	176	20	90	12	360	35	2.018	1.867	0.026	0.1813	0.0021	0.64773	0.07506	0.00096	1069.3	9.2	1074	11	1069	25		100.44	100.468
Felicia-1, 1555-1565 m	#255	812	61	126	47	470	170	8	1.715	0.036	0.1698	0.0038	0.93901	0.07265	0.00053	1014	13	1011	21	1004	15		99.7041	100.697
Felicia-1, 1555-1565 m	#256	149	27	69	15	454	92	2.182	4.29	0.23	0.303	0.016	0.94745	0.1027	0.0011	1691	44	1706	81	1672	19		100.887	102.033
Felicia-1, 1555-1565 m	#258	73.8	6.8	23.4	2.2	91	6.7	3.159	1.775	0.029	0.1761	0.0027	0.32967	0.07303	0.00077	1036	11	1046	15	1015	21		100.965	103.054
Felicia-1, 1555-1565 m	#259	174	4.1	73.7	1.7	476	26	2.362	4.24	0.11	0.3011	0.0081	0.95623	0.1021	0.0012	1682	21	1697	40	1663	21		100.892	102.044
Felicia-1, 1555-1565 m	#261	469	29	80	11	339	49	5.95	1.778	0.026	0.1749	0.0021	0.88742	0.07366	0.00058	1037.2	9.6	1039	12	1032	16		100.174	100.678
Felicia-1, 1555-1565 m	#268	408	22	108.1	7.7	636	48	3.787	3.461	0.024	0.2605	0.0029	0.49417	0.09623	0.00077	1518.3	5.5	1493	15	1552	15		98.3337	96.1985
Felicia-1, 1555-1565 m	#272	430	48	306	49	1800	270	1.415	3.78	0.11	0.2761	0.007	0.98225	0.09921	0.00055	1588	23	1572	35	1609	10		98.9924	97.7004
Felicia-1, 1555-1565 m	#273	313	23	40.1	3	188	13	7.59	2.104	0.02	0.1952	0.0015	0.69393	0.07808	0.00062	1150.1	6.5	1149.6	7.9	1149	16		99.9565	100.052
Felicia-1, 1555-1565 m	#274	1188	54	626	64	2120	220	1.88	1.49	0.041	0.1539	0.0044	0.9498	0.07018	0.00062	926	17	923	24	933	18		99.676	98.9282
Felicia-1, 1555-1565 m	#280	273	34	186	40	1140	240	1.54	4.132	0.055	0.2972	0.0043	0.4531	0.1007	0.001	1660	11	1677	22	1638	19		101.024	102.381
Felicia-1, 1555-1565 m	#281	138.8	4.9	40.4	1.1	189.8	5.5	3.454	2.28	0.055	0.2055	0.0034	0.81193	0.0803	0.0013	1205	17	1205	18	1203	31		100	100.166
Felicia-1, 1555-1565 m	#282	256	23	32.1	4.3	144	16	8.32	1.98	0.032	0.1882	0.0029	0.89443	0.07602	0.00083	1108	11	1112	16	1095	22		100.361	101.553
Felicia-1, 1555-1565 m	#283	170	41	24.4	2.1	97.1	8.2	7.4	1.64	0.041	0.1654	0.0036	0.81794	0.07187	0.00088	986	16	986	20	982	25		100	100.407
Felicia-1, 1555-1565 m	#284	142	16	36.8	5.9	191	18	3.92	2.97	0.11	0.2457	0.0097	0.91887	0.0876	0.001	1399	28	1416	50	1373	22		101.215	103.132
Felicia-1, 1555-1565 m	#285	670	110	152	39	850	180	4.55	3.282	0.053	0.2576	0.0039	0.9366	0.09249	0.00039	1476	13	1477	20	1477.4	8		100.068	99.9729
Felicia-1, 1555-1565 m	#286	568	27	133	12	716	64	4.3	3.208	0.029	0.2482	0.0041	0.80977	0.0937	0.001	1459	7	1429	21	1501	21		97.9438	95.2032
Felicia-1, 1555-1565 m	#293	68.6	7.2	41.9	5.3	154	15	1.642	1.61	0.031	0.163	0.0026	0.82072	0.0721	0.0011	978	14	974	14	989	30		99.591	98.4833
Felicia-1, 1555-1565 m	#294	139.4	9.5	51.7	2.5	208.1	9.2	2.66	1.847	0.048	0.1831	0.0052	0.7911	0.0723	0.0012	1062	17	1084	28	994	34		102.072	109.054
Felicia-1, 1555-1565 m	#295	889	53	242	24	1050	78	3.68	2.313	0.036	0.2044	0.0056	0.86872	0.082	0.0016	1216	11	1199	30	1245	39		98.602	96.3052
Felicia-1, 1555-1565 m	#296	232	33	76	16	324	63	3.3	2.098	0.056	0.1925	0.0044	0.89903	0.07925	0.00088	1147	18	1135	24	1178	22		98.9538	96.3497
Felicia-1, 1555-1565 m	#297	387	44	332	37	2050	190	1.204	4	0.042	0.2875	0.0026	0.81318	0.10115	0.00071	1634.1	8.6	1629	13	1645	13		99.6879	99.0274
Felicia-1, 1555-1565 m	#298	165	13	63	11	271	42	2.67	2.204	0.057	0.2044	0.0055	0.85982	0.0782	0.0014	1182	18	1199	29	1150	35		101.438	104.261
Felicia-1, 1555-1565 m	#299	260	45	179	45	1040	210	1.49	4.13	0.22	0.293	0.012	0.94337	0.1019	0.002	1659	44	1658	59	1659	37		99.9397	99.9397
Felicia-1, 1555-1565 m	#300	440	100	136	24	730	100	3.18	3.35	0.25	0.261	0.018	0.97209	0.0931	0.0029	1492	61	1493	92	1489	58		100.067	100.269
Felicia-1, 1555-1565 m	#307	305	42	79	12	353	58	3.85	2.399	0.045	0.2187	0.0039	0.95133	0.0795	0.001	1242	13	1275	21	1184	26		102.657	107.686
Felicia-1, 1555-1565 m	#311	926	87	237	42	1070	140	3.92	2.406	0.057	0.2082	0.0051	0.93289	0.08371	0.0009	1244	17	1219	27	1286	21		97.9904	94.79
Felicia-1, 1555-1565 m	#312	73.2	7.2	36.1	5.6	192	33	2.03	2.764	0.081	0.2315	0.0048	0.68738	0.0865	0.0015	1346	22	1342	25	1349	33		99.7028	99.4811
Felicia-1, 1555-1565 m	#313	197	12	25.4	3	143	12	7.87	2.851	0.05	0.2353	0.0041	0.7514	0.0872	0.0012	1369	13	1362	21	1364	26		99.4887	99.8534
Felicia-1, 1555-1565 m	#319	97.8	6.3	60.7	6.2	247	22	1.598	1.835	0.053	0.1763	0.0035	0.74851	0.0754	0.0012	1058	19	1047	19	1079	32		98.9603	97.0343
Felicia-1, 1555-1565 m	#322	331	18	168	16	1040	120	1.922	3.89	0.13	0.2873	0.0097	0.92145	0.0982	0.0013	1611	28	1627	49	1590	26		100.993	102.327
Felicia-1, 1555-1565 m	#324	249	18	58	5.2	258.1	9.8	4.26	2.163	0.048	0.2035	0.0045	0.96684	0.07686	0.00063	1169	15	1194	24	1117	16		102.139	106.893
Felicia-1, 1555-1565 m	#326	121.6	9.5	35.5	3.6	160.5	7.5	3.41	2.134	0.076	0.197	0.0091	0.98644	0.0785	0.0011	1159	25	1159	49	1160	28		100	99.9138
Felicia-1, 1555-1565 m	#336	116.8	9.1	27	2.5	134	10	4.346	2.58	0.052	0.2243	0.0023	0.47389	0.0834	0.0015	1295	15	1305	12	1278	34		100.772	102.113
Felicia-1, 1555-1565 m	#337	553	40	153	16	763	77	3.64	2.431	0.041	0.2141	0.002	0.91989	0.0819	0.0013	1252	12	1251	10	1241	32		99.9201	100.806
Felicia-1, 1555-1565 m	#339	257.6	9.9	65.8	4.3	275	21	3.96	2.194	0.043	0.1999	0.0042	0.91125	0.07954	0.00069	1179	14	1175	23	1185	17		99.6607	99.1561
Felicia-1, 1555-1565 m	#345	806	67	212	26	969	92	3.83	2.301	0.039	0.209	0.0027	0.8774	0.08046	0.00058	1212	12	1223	14	1208	14		100.908	101.242
Felicia-1, 1555-1565 m	#346	447	19	112.9	8.5	457	47	3.95	2.206	0.065	0.1999	0.0059	0.88713	0.08	0.0011	1183	21	1175	32	1196	27		99.3238	98.2441
Felicia-1, 1555-1565 m	#348	219	25	55.4	4.2	333	10	3.93	4.09	0.16	0.292	0.012	0.93979	0.1015	0.0014	1651	32	1650	60	1651	26		99.9394	99.9394
Felicia-1, 1555-1565 m	#349	520	89	56	11	276	56	11.7	2.544	0.092	0.2208	0.0071	0.97707	0.08346	0.00068	1284	27	1286	38	1280	16		100.156	100.469
Felicia-1, 1555-1565 m	#350	476	72	41.7	2.8	177	22	11.2	1.866	0.037	0.1835	0.0024	0.84403	0.07363	0.00087	1069	13	1086	13	1031	24		101.59	105.335
Felicia-1, 1555-1565 m	#352	130.3	4.6	45.4	2.6	159.8	8.4	2.865	1.85	0.085	0.183	0.01	0.87723	0.0731	0.0019	1063	30	1086	56	1017	53		102.164	106.785
Felicia-1, 1555-1565 m	#360	265	11	117.3	6.8	794	22	2.276	4.194	0.053	0.2942	0.0043	0.88453	0.10329	0.00071	1673	10	1662	21	1684	13		99.3425	98.6936
Felicia-1, 1555-1565 m	#361	431	16	39.6	1.1	287.4	9.8	10.95	4.88	0.12	0.324	0.01	0.93476	0.1092	0.0012	1798	20	1807	49	1786	20		100.501	101.176
Felicia-1, 1555-1565 m	#362	61.9	6.3	33.2	4.9	126	13	1.882	1.893	0.04	0.187	0.0057	0.92933	0.0734	0.001	1079	14	1105	31	1024	28		102.41	107.91
Felicia-1, 1555-1565 m	#364	1640	120	408	18	1680	150	4.154	2.266	0.048	0.2097	0.0052	0.84081	0.0783	0.0011	1202	15	1227	28	1154	27		102.08	106.326
Felicia-1, 1555-1565 m	#365	1034	65	179	11	839	50	5.85	2.451	0.084	0.2142	0.0081	0.932	0.0829	0.0012	1258	25	1251	43	1267	29		99.4436	98.7372
Felicia-1, 1555-1565 m	#371	290	19	59.6	3.5	238	17	4.91	1.822	0.027	0.179	0.0026	0.25882	0.0738	0.0011	1053.3	9.6	1062	14	1034	30		100.826	102.708
Felicia-1, 1555-1565 m	#372	92.6	3.7	70.1	2.7	297	12	1.323	1.87	0.06	0.1816	0.0032	0.84533	0.0745	0.0013	1070	21	1076	17	1055	35		100.561	101.991
Felicia-1, 1555-1565 m	#373	255	33	138	24	513	64	1.855	1.838	0.031	0.1774	0.005	0.98028	0.07509	0.00091	1059	11	1053	27	1071	24		99.4334	98.3193
Felicia-1, 1555-1565 m	#374	860	320	144	88	610	340	6.4	2.146	0.03	0.1977	0.0064	0.97901	0.0787	0.0014	1163.8	9.7	1163	34	1164	37		99.9313	99.9141
Felicia-1, 1555-1565 m	#376	189	57	107	40	450	150	1.81	2.033	0.065	0.1865	0.0047	0.93529	0.079	0.001	1126	22	1102	26	1171	25		97.8686	94.1076
Felicia-1, 1555-1565 m	#378	200.2	1.5	107.4	8.2	653	70	1.89	4.076	0.095	0.2916	0.0078	0.91412	0.1013	0.0011	1649	19	1649	39	1648	21		100	100.061
Felicia-1, 1555-1565 m	#384	167	18	79.9	9.9	439	39	2.061	3.415	0.059	0.2662	0.0066	0.99481	0.09297	0.00098	1508	14	1521	33	1487	20		100.862	102.286
Felicia-1, 1555-1565 m	#385	1810	200	61.4	6.4	230	19	29.8	1.776	0.03	0.1757	0.0029	0.73782	0.07325	0.00094	1037	11	1043	16	1020	26		100.579	102.255
Felicia-1, 1555-1565 m	#387	800	96	152	22	800	100	5.299	2.783	0.079	0.2262	0.007	0.85509	0.08873	0.00048	1351	21	1314	37	1398	10		97.2613	93.9914
Felicia-1, 1555-1565 m	#388	111.5	2.9	46.9	1.7	373	22	2.329	4.71	0.14	0.3318	0.0083	0.93165	0.10253	0.00099	1768	24	1847	40	1670	18		104.468	110.599
Felicia-1, 1555-1565 m	#390	93.4	9.8	30.5	3.3	129	10	3.025	1.859	0.039	0.1798	0.0033	0.65738	0.0758	0.0012	1066	14	1066	18	1088	31		100	97.9779
Felicia-1, 1555-1565 m	#391	294	25	221	28	1340	120	1.313	3.873	0.031	0.2817	0.004	0.0020211	0.0996	0.0014	1608.1	6.4	1600	20	1617	26		99.4963	98.9487
Felicia-1, 1555-1565 m	#397	857	79	92	12	374	39	9.3	1.746	0.026	0.1716	0.0049	0.82621	0.0738	0.0013	1025.7	9.8	1021	27	1035	34		99.5418	98.6473
Felicia-1, 1555-1565 m	#398	232	45	93	21	610	110	2.481	4.01	0.065	0.2909	0.0059	0.94341	0.09915	0.00074	1636	13	1646	29	1608	14		100.611	102.363
Felicia-1, 1555-1565 m	#399	438	21	1.3	0.11	10.2	1.7	335	3.088	0.078	0.249	0.005	0.99262	0.08985	0.00075	1430	19	1433	26	1422	16		100.21	100.774
Felicia-1, 1555-1565 m	#401	759	83	39.6	2.9	133	17	19.31	1.714	0.018	0.1683	0.0018	0.7371	0.0742	0.0008	1016.1	5.5	1003	10	1047	22		98.7108	95.7975
Felicia-1, 1555-1565 m	#402	276.1	6.6	44.9	2.3	202.7	9.1	6.21	1.86	0.029	0.1809	0.0023	0.79294	0.07433	0.00068	1067	10	1072	12	1050	19		100.469	102.095
Felicia-1, 1555-1565 m	#404	1880	120	716	63	3040	190	2.62	2.138	0.042	0.1948	0.0049	0.80952	0.07955	0.00082	1161	14	1147	27	1186	20		98.7941	96.7116
Felicia-1, 1555-1565 m	#410	247	28	65	10	361	39	3.87	3.379	0.097	0.2687	0.0051	0.76745	0.0911	0.0013	1499	23	1534	26	1448	27		102.335	105.939
Felicia-1, 1555-1565 m	#411	332	51	81	14	471	70	4.08	3.668	0.038	0.2756	0.0036	0.96238	0.09644	0.00064	1564.3	8.2	1569	18	1556	12		100.3	100.835
Felicia-1, 1555-1565 m	#414	565	77	455	61	1500	150	1.25	1.548	0.066	0.1592	0.0078	0.99525	0.07049	0.0006	949	26	952	43	943	17		100.316	100.954
Felicia-1, 1555-1565 m	#269	396	32	71	13	460	140	5.89	2.123	0.099	0.1978	0.0045	0.78345	0.0777	0.0025	1155	32	1163	24	1137	63	X	100.693	102.287
Felicia-1, 1555-1565 m	#417	910	310	114	26	575	56	7.7	1.791	0.085	0.1733	0.0084	0.97043	0.075	0.0022	1042	31	1030	46	1067	59	X	98.8484	96.5323
Felicia-1, 1615-1620 m	#007	540	170	80	27	400	100	6.8	2.86	0.19	0.238	0.014	0.97912	0.08736	0.00084	1372	50	1374	73	1368	19		100.146	100.439
Felicia-1, 1615-1620 m	#008	337	18	62.8	3	258.7	5	5.4	1.763	0.029	0.1733	0.0028	0.7916	0.07371	0.0008	1032	11	1030	15	1033	22		99.8062	99.7096
Felicia-1, 1615-1620 m	#011	1510	220	206	36	420	120	6.99	1.63	0.025	0.1639	0.0026	0.98503	0.07194	0.00053	981.7	9.9	978	14	984	15		99.6231	99.3902
Felicia-1, 1615-1620 m	#012	163.4	4.4	46.7	1.5	190.9	7.4	3.535	1.869	0.042	0.1818	0.0046	0.61707	0.0751	0.0012	1070	15	1077	25	1070	33		100.654	100.654
Felicia-1, 1615-1620 m	#014	2250	100	593	27	2890	130	3.794	2.869	0.095	0.2348	0.0085	0.89921	0.0886	0.0016	1374	25	1359	44	1395	35		98.9083	97.4194
Felicia-1, 1615-1620 m	#024	524	70	193	37	1240	200	2.82	4.33	0.11	0.3046	0.0069	0.82222	0.1043	0.0019	1698	21	1714	34	1702	34		100.942	100.705
Felicia-1, 1615-1620 m	#025	171	24	108	15	407	40	1.597	1.837	0.098	0.179	0.01	0.94976	0.0745	0.0013	1058	36	1060	57	1056	36		100.189	100.379
Felicia-1, 1615-1620 m	#035	1064	67	148	13	747	44	7.36	2.706	0.051	0.2348	0.0039	0.89056	0.08301	0.00076	1330	14	1360	20	1269	18		102.256	107.171
Felicia-1, 1615-1620 m	#036	249	39	53	12	302	52	4.94	3.69	0.21	0.277	0.015	0.94991	0.0959	0.0011	1567	46	1574	75	1546	22		100.447	101.811
Felicia-1, 1615-1620 m	#038	457	51	181	18	1070	110	2.76	3.517	0.054	0.2703	0.0044	0.92861	0.09473	0.0006	1531	12	1542	22	1522	12		100.718	101.314
Felicia-1, 1615-1620 m	#039	407	26	193	11	1252	97	2.134	4.29	0.19	0.302	0.013	0.95952	0.1029	0.0013	1690	37	1701	64	1676	23		100.651	101.492
Felicia-1, 1615-1620 m	#047	118	12	25	2.6	125	11	4.83	2.464	0.064	0.2196	0.0051	0.9463	0.0815	0.0011	1261	19	1280	27	1233	27		101.507	103.812
Felicia-1, 1615-1620 m	#048	353	14	169.2	9.3	702	37	2.124	2.623	0.043	0.2227	0.0045	0.95044	0.08537	0.00088	1307	12	1296	24	1324	20		99.1584	97.8852
Felicia-1, 1615-1620 m	#050	185	13	134	18	513	62	1.5	1.82	0.036	0.1762	0.0024	0.8207	0.07496	0.00078	1052	13	1046	13	1073	19		99.4297	97.4837
Felicia-1, 1615-1620 m	#051	1610	160	181	44	400	85	9.5	1.592	0.047	0.1609	0.0031	0.96402	0.0717	0.001	967	18	962	17	977	29		99.4829	98.4647
Felicia-1, 1615-1620 m	#052	986	38	337	38	1400	120	3.04	2.275	0.046	0.2036	0.0027	0.93692	0.08018	0.00038	1204	14	1195	14	1201.3	9.4		99.2525	99.4756
Felicia-1, 1615-1620 m	#053	1029	52	101.4	7.7	314	21	10.38	1.777	0.066	0.1739	0.0061	0.9572	0.07404	0.00077	1036	24	1033	33	1042	21		99.7104	99.1363
Felicia-1, 1615-1620 m	#060	758	75	188	22	666	60	4.12	1.534	0.014	0.1586	0.0016	0.84462	0.06991	0.00046	944.2	5.4	948.8	9.1	926	13		100.487	102.462
Felicia-1, 1615-1620 m	#061	469	43	113.1	9.2	422	15	4.211	1.769	0.057	0.1738	0.0054	0.93971	0.07375	0.0008	1034	21	1033	30	1034	22		99.9033	99.9033
Felicia-1, 1615-1620 m	#062	459	53	109	33	273	36	5.1	1.511	0.088	0.1557	0.008	0.98613	0.07029	0.00078	933	36	932	45	936	22		99.8928	99.5726
Felicia-1, 1615-1620 m	#063	76.7	3.2	14.18	0.99	64.6	4.1	5.54	2.111	0.055	0.196	0.0027	0.63169	0.0785	0.0016	1152	18	1154	15	1158	41		100.174	99.6546
Felicia-1, 1615-1620 m	#065	197	23	35.1	5.4	159	24	5.9	1.778	0.035	0.1737	0.0033	0.8472	0.07402	0.00086	1037	13	1032	18	1041	23		99.5178	99.1354
Felicia-1, 1615-1620 m	#066	156.5	8.7	70.8	5.5	289	15	2.25	1.788	0.047	0.1746	0.0053	0.81456	0.0742	0.0015	1041	17	1038	29	1046	40		99.7118	99.2352
Felicia-1, 1615-1620 m	#072	1026	20	114	10	464	53	8.9	2.613	0.081	0.2254	0.0054	0.84902	0.084	0.0014	1304	23	1310	29	1292	32		100.46	101.393
Felicia-1, 1615-1620 m	#073	867	32	199	11	973	64	4.42	3.066	0.087	0.2443	0.0086	0.9904	0.091	0.00076	1424	22	1409	45	1446	16		98.9466	97.4412
Felicia-1, 1615-1620 m	#074	271	74	65.4	6.1	309	36	3.94	2.336	0.089	0.208	0.0083	0.96889	0.08144	0.00081	1222	28	1218	45	1232	20		99.6727	98.8636
Felicia-1, 1615-1620 m	#076	209	19	51.5	4.4	187	11	4.108	1.566	0.024	0.16	0.0018	0.77517	0.07092	0.00083	956.6	9.5	956.7	9.8	954	24		100.01	100.283
Felicia-1, 1615-1620 m	#077	81	12	38	5.5	170	23	2.134	1.953	0.053	0.1874	0.0043	0.76019	0.0741	0.0013	1099	18	1107	23	1043	36		100.728	106.136
Felicia-1, 1615-1620 m	#079	349	29	95.7	9.9	494	57	3.65	2.548	0.053	0.2251	0.0045	0.93951	0.08228	0.00061	1285	15	1309	24	1252	14		101.868	104.553
Felicia-1, 1615-1620 m	#085	417	28	120	11	705	64	3.5	3.531	0.064	0.2686	0.0049	0.94775	0.09557	0.00057	1539	11	1533	25	1539	11		99.6101	99.6101
Felicia-1, 1615-1620 m	#088	502	34	145.6	9.6	445	27	3.45	1.724	0.044	0.1668	0.0024	0.60383	0.0742	0.0016	1017	16	995	13	1046	43		97.8368	95.1243
Felicia-1, 1615-1620 m	#089	576	78	159	27	710	100	3.68	2.372	0.059	0.2102	0.0047	0.93653	0.08147	0.00055	1234	18	1230	25	1233	13		99.6759	99.7567
Felicia-1, 1615-1620 m	#090	222	55	22.7	3.3	116.1	9.9	9.7	3.31	0.2	0.26	0.014	0.94399	0.0924	0.0018	1483	48	1488	71	1475	38		100.337	100.881
Felicia-1, 1615-1620 m	#091	566	64	634	81	2180	430	0.898	1.664	0.059	0.1661	0.006	0.98782	0.07264	0.00041	995	23	990	33	1004	12		99.4975	98.6056
Felicia-1, 1615-1620 m	#092	394	44	65	9.7	369	29	6.12	3.43	0.19	0.264	0.013	0.96789	0.094	0.0013	1511	43	1512	67	1508	27		100.066	100.265
Felicia-1, 1615-1620 m	#099	206	23	69.1	4.4	266.5	8.3	2.98	1.996	0.065	0.1916	0.0084	0.98687	0.07393	0.00079	1114	22	1130	45	1039	22		101.436	108.758
Felicia-1, 1615-1620 m	#101	377	72	211	68	750	280	1.87	1.797	0.056	0.1787	0.008	0.86458	0.0729	0.0017	1044	20	1060	44	1011	47		101.533	104.847
Felicia-1, 1615-1620 m	#102	176	16	85	12	519	64	2.11	4.167	0.094	0.2969	0.0082	0.92738	0.1023	0.001	1667	18	1676	41	1666	19		100.54	100.6
Felicia-1, 1615-1620 m	#103	423	22	128	10	751	56	3.34	3.506	0.077	0.2678	0.004	0.83471	0.09526	0.00085	1528	17	1529	20	1533	17		100.065	99.7391
Felicia-1, 1615-1620 m	#105	200	17	93.1	6.1	375	24	2.12	1.851	0.037	0.1785	0.002	0.59005	0.0755	0.0011	1063	13	1059	11	1082	29		99.6237	97.8743
Felicia-1, 1615-1620 m	#111	158	12	32.5	2.5	182	12	4.88	3.53	0.061	0.2696	0.0062	0.87089	0.0944	0.0008	1534	14	1539	31	1516	16		100.326	101.517
Felicia-1, 1615-1620 m	#114	344	10	70.7	3.9	343.9	8.7	4.81	2.527	0.062	0.2197	0.0058	0.92357	0.0826	0.0009	1279	18	1280	31	1259	21		100.078	101.668
Felicia-1, 1615-1620 m	#116	1180	170	98	11	357	10	12.2	1.901	0.069	0.1842	0.006	0.90571	0.0748	0.0012	1081	24	1090	33	1063	31		100.833	102.54
Felicia-1, 1615-1620 m	#118	289	56	55.9	6.7	200	37	5.4	1.71	0.11	0.169	0.01	0.96636	0.0734	0.0012	1013	41	1008	57	1024	33		99.5064	98.4375
Felicia-1, 1615-1620 m	#126	330	120	101	47	410	160	3.39	2.045	0.078	0.1904	0.007	0.98335	0.07783	0.00042	1130	26	1123	38	1143	11		99.3805	98.2502
Felicia-1, 1615-1620 m	#131	137.2	9.8	58.2	3.9	233	15	2.354	1.953	0.066	0.1867	0.0069	0.87947	0.0746	0.0016	1099	23	1103	38	1056	44		100.364	104.451
Felicia-1, 1615-1620 m	#138	430	150	57	13	295	75	7.2	3.108	0.092	0.2479	0.0074	0.96457	0.09087	0.00072	1434	22	1427	38	1444	15		99.5119	98.8227
Felicia-1, 1615-1620 m	#141	176.9	8.5	32.87	0.81	144.8	4.6	5.31	2.137	0.024	0.1986	0.0021	0.6601	0.07804	0.00079	1160.7	7.7	1168	11	1147	20		100.629	101.831
Felicia-1, 1615-1620 m	#143	191	14	128	15	478	59	1.502	1.798	0.028	0.1742	0.0024	0.65414	0.07508	0.00046	1045	10	1035	13	1071	12		99.0431	96.6387
Felicia-1, 1615-1620 m	#144	125	19	34.7	6.3	165	27	3.65	2.573	0.023	0.2244	0.0067	0.83931	0.0826	0.0018	1293	6.6	1305	35	1259	43		100.928	103.654
Felicia-1, 1615-1620 m	#153	1920	260	271	32	488	17	7.05	1.598	0.062	0.1636	0.0062	0.98596	0.07076	0.00052	969	24	977	34	950	15		100.826	102.842
Felicia-1, 1615-1620 m	#156	338	12	61.2	1.4	363	13	5.45	3.384	0.036	0.2624	0.0027	0.94427	0.09328	0.00057	1500.5	8.3	1502	14	1493	12		100.1	100.603
Felicia-1, 1615-1620 m	#157	610	80	149	25	907	98	4.15	3.34	0.13	0.2624	0.0086	0.98034	0.09212	0.00085	1489	31	1502	44	1470	18		100.873	102.177
Felicia-1, 1615-1620 m	#163	332	33	119.7	8.5	491	41	2.87	1.835	0.038	0.1791	0.0038	0.94147	0.07356	0.0005	1058	14	1062	21	1029	14		100.378	103.207
Felicia-1, 1615-1620 m	#165	160	11	55.4	3.9	231	12	2.86	1.867	0.031	0.181	0.0015	0.019805	0.075	0.0011	1069	11	1072.4	8.4	1068	29		100.318	100.412
Felicia-1, 1615-1620 m	#166	218	18	65.7	4.5	259	13	3.285	1.836	0.074	0.1781	0.0077	0.9481	0.0747	0.001	1058	27	1056	42	1061	28		99.811	99.5287
Felicia-1, 1615-1620 m	#167	73.8	3.2	41.5	0.64	265	12	1.779	4.26	0.14	0.3008	0.0087	0.91897	0.10207	0.00089	1694	23	1709	36	1662	16		100.885	102.828
Felicia-1, 1615-1620 m	#169	37.4	3.3	24.3	2.1	124.8	7.6	1.527	2.732	0.039	0.2376	0.0054	0.68368	0.08335	0.00085	1337	11	1374	28	1277	20		102.767	107.596
Felicia-1, 1615-1620 m	#170	959	23	136	11	649	31	7.05	2.631	0.053	0.2219	0.0052	0.90797	0.08594	0.00085	1309	15	1292	27	1337	19		98.7013	96.6343
Felicia-1, 1615-1620 m	#176	837	42	211	24	791	73	4	1.798	0.03	0.175	0.0032	0.94898	0.07452	0.00063	1045	11	1040	18	1055	17		99.5215	98.5782
Felicia-1, 1615-1620 m	#177	642	87	32.2	7.9	109	22	20	2.957	0.024	0.242	0.0041	0.89008	0.08932	0.00088	1396.6	6.1	1397	21	1411	19		100.029	99.0078
Felicia-1, 1615-1620 m	#178	1650	280	130	19	438	66	12.55	1.742	0.065	0.1722	0.0047	0.97675	0.0733	0.0013	1024	24	1024	26	1021	36		100	100.294
Felicia-1, 1615-1620 m	#181	409	42	123	13	436	50	3.309	1.72	0.041	0.168	0.0036	0.73727	0.0742	0.0012	1016	15	1001	20	1047	33		98.5236	95.6065
Felicia-1, 1615-1620 m	#183	1495	75	645	37	3330	200	2.382	3.331	0.057	0.2656	0.0034	0.88069	0.09139	0.00069	1488	13	1518	17	1454	14		102.016	104.402
Felicia-1, 1615-1620 m	#189	530	71	115	37	700	150	5.1	3.34	0.12	0.261	0.013	0.94863	0.09365	0.00094	1490	28	1494	67	1501	19		100.268	99.5336
Felicia-1, 1615-1620 m	#195	2790	370	238	64	597	59	12.1	1.664	0.072	0.1682	0.0087	0.99548	0.07174	0.00089	995	27	1002	48	978	25		100.704	102.454
Felicia-1, 1615-1620 m	#196	347	80	46.4	3.9	230	27	7.5	2.46	0.2	0.216	0.019	0.96687	0.08249	0.00061	1259	58	1260	98	1257	15		100.079	100.239
Felicia-1, 1615-1620 m	#204	643	71	214	20	760	81	3.005	1.678	0.03	0.1638	0.0017	0.99302	0.07425	0.00072	1000	11	977.7	9.3	1048	20		97.77	93.292
Felicia-1, 1615-1620 m	#205	116	12	22.88	0.76	89.9	5.2	5.08	2.097	0.058	0.1901	0.0038	0.71203	0.0799	0.0015	1147	19	1122	20	1194	37		97.8204	93.9698
Felicia-1, 1615-1620 m	#206	266	32	130	26	630	110	2.11	2.506	0.068	0.2176	0.0059	0.94546	0.08347	0.00095	1273	20	1269	31	1280	22		99.6858	99.1406
Felicia-1, 1615-1620 m	#209	416	47	87.3	8.7	326	41	4.29	2.218	0.05	0.1971	0.0034	0.65765	0.0816	0.0018	1187	16	1160	18	1234	43		97.7254	94.0032
Felicia-1, 1615-1620 m	#078	580	15	72	17	403	54	9	2.71	0.12	0.2222	0.0092	0.88078	0.0885	0.002	1331	35	1293	49	1392	42	X	97.145	92.8879
Felicia-1, 1615-1620 m	#115	623	50	202	48	1020	130	3.33	3.17	0.15	0.2529	0.0076	0.92447	0.0906	0.002	1447	36	1453	39	1437	42	X	100.415	101.113
Felicia-1, 1615-1620 m	#129	890	220	93	42	310	130	11.4	1.592	0.083	0.161	0.0062	0.94268	0.0716	0.0014	966	32	962	35	975	40	X	99.5859	98.6667
Felicia-1, 1615-1620 m	#140	1020	140	258	47	490	160	4.25	1.682	0.045	0.1681	0.0041	0.87273	0.0725	0.00094	1001	17	1001	22	999	27	X	100	100.2
Felicia-1, 1615-1620 m	#168	385	15	102.7	3.8	378	12	3.731	1.614	0.049	0.1636	0.0026	0.97639	0.0714	0.0011	975	19	977	14	968	31	X	100.205	100.93
Felicia-1, 1615-1620 m	#180	1660	300	391	97	1420	400	4.29	1.56	0.11	0.1591	0.0068	0.95677	0.0712	0.0024	955	45	952	38	961	71	X	99.6859	99.0635
Felicia-1, 1615-1620 m	#203	280	33	82	10	321	41	3.43	1.6	0.078	0.1607	0.0032	0.47686	0.072	0.0024	969	31	961	18	984	70	X	99.1744	97.6626
13/1-U-1, 292.22-292.50 m	#007	354	24	159	13	1004	92	2.247	3.444	0.038	0.265	0.003	0.8111	0.09381	0.00076	1514.4	8.8	1515	15	1504	15		100.04	100.731
13/1-U-1, 292.22-292.50 m	#008	191	26	31.3	3.7	173	23	6.02	3.267	0.057	0.2434	0.0026	0.78117	0.09776	0.00097	1473	14	1404	14	1582	19		95.3157	88.7484
13/1-U-1, 292.22-292.50 m	#010	94	14	25.3	4.8	157	26	3.84	3.561	0.041	0.2698	0.0023	0.67963	0.0952	0.00089	1540.8	9.2	1540	12	1532	18		99.9481	100.522
13/1-U-1, 292.22-292.50 m	#011	124	14	50	12	360	73	2.56	3.992	0.067	0.2841	0.0057	0.91968	0.10241	0.00062	1632	14	1612	29	1668	11		98.7745	96.6427
13/1-U-1, 292.22-292.50 m	#012	149	12	21.11	0.25	147.9	8.3	7	4.17	0.1	0.3081	0.0073	0.85851	0.0982	0.0013	1667	20	1731	36	1589	25		103.839	108.936
13/1-U-1, 292.22-292.50 m	#013	348	39	104	17	630	87	3.37	3.739	0.052	0.2808	0.0053	0.95317	0.0963	0.0013	1580	11	1595	27	1552	25		100.949	102.771
13/1-U-1, 292.22-292.50 m	#022	306	13	189	13	1281	91	1.576	3.94	0.031	0.2841	0.002	0.40639	0.1017	0.0011	1624.5	7.5	1612	10	1655	21		99.2305	97.4018
13/1-U-1, 292.22-292.50 m	#023	519	37	110.7	9.1	625	33	4.662	3.482	0.057	0.2729	0.0054	0.92057	0.0922	0.0018	1523	13	1555	28	1472	37		102.101	105.639
13/1-U-1, 292.22-292.50 m	#024	319	22	87.7	5.2	496	42	3.62	3.97	0.1	0.287	0.01	0.90903	0.1001	0.0016	1628	21	1625	52	1625	30		99.8157	100
13/1-U-1, 292.22-292.50 m	#025	357	22	144.5	8	933	43	2.457	3.922	0.075	0.281	0.008	0.80959	0.1009	0.0015	1618	16	1596	40	1641	27		98.6403	97.2578
13/1-U-1, 292.22-292.50 m	#026	312	28	162	17	1004	54	1.908	4.236	0.069	0.2976	0.0081	0.97759	0.10149	0.00077	1681	13	1679	40	1652	14		99.881	101.634
13/1-U-1, 292.22-292.50 m	#036	439	85	243	71	1320	260	1.98	3.57	0.16	0.269	0.014	0.96186	0.09632	0.00084	1541	37	1533	69	1554	16		99.4809	98.6486
13/1-U-1, 292.22-292.50 m	#038	339	27	76	7.4	302	23	4.42	1.881	0.023	0.1795	0.0027	0.88676	0.07577	0.0005	1074.4	8.1	1064	15	1089	13		99.032	97.7043
13/1-U-1, 292.22-292.50 m	#039	480	37	150	18	923	95	3.15	3.585	0.059	0.272	0.0038	0.74153	0.09523	0.00071	1546	13	1551	19	1532	14		100.323	101.24
13/1-U-1, 292.22-292.50 m	#040	324	26	63.6	5.6	279	17	5.047	2.487	0.03	0.2174	0.002	0.48004	0.0829	0.0014	1268	8.8	1268	10	1265	33		100	100.237
13/1-U-1, 292.22-292.50 m	#046	318	35	88.3	9.8	600	60	3.57	4.595	0.058	0.3174	0.0046	0.8453	0.10441	0.00083	1748	11	1777	22	1704	15		101.659	104.284
13/1-U-1, 292.22-292.50 m	#050	421	53	175	29	930	110	2.39	3.318	0.045	0.2453	0.0042	0.7263	0.0981	0.0023	1485	11	1414	22	1587	43		95.2189	89.0989
13/1-U-1, 292.22-292.50 m	#051	771	89	91	12	215	22	8.43	1.135	0.031	0.1204	0.0031	0.74689	0.0681	0.0013	770	15	733	18	873	39		95.1948	83.9633
13/1-U-1, 292.22-292.50 m	#053	206	36	56	11	327	55	3.667	3.464	0.049	0.2661	0.0027	0.65243	0.0935	0.0014	1519	11	1521	14	1497	29		100.132	101.603
13/1-U-1, 292.22-292.50 m	#060	314	42	51	12	262	66	6.46	2.671	0.075	0.2276	0.0027	0.84039	0.0853	0.0016	1320	21	1322	14	1322	36		100.152	100
13/1-U-1, 292.22-292.50 m	#061	351	51	64	18	318	77	5.84	2.318	0.02	0.2122	0.0026	0.56164	0.0786	0.0012	1217.8	6.1	1240	14	1162	29		101.823	106.713
13/1-U-1, 292.22-292.50 m	#064	192	12	139	11	973	91	1.44	4.02	0.12	0.2933	0.0068	0.97005	0.0998	0.0011	1637	24	1658	34	1621	20		101.283	102.283
13/1-U-1, 292.22-292.50 m	#072	324	25	225	17	947	61	1.478	1.846	0.019	0.1831	0.0018	0.70201	0.07394	0.0006	1061.9	6.7	1083.8	9.6	1040	17		102.062	104.212
13/1-U-1, 292.22-292.50 m	#075	268	30	162	35	1080	210	1.71	3.814	0.085	0.278	0.0048	0.91169	0.1005	0.0014	1595	18	1581	24	1633	25		99.1223	96.8157
13/1-U-1, 292.22-292.50 m	#076	694	37	273	13	1067	38	2.58	1.965	0.042	0.1831	0.0044	0.93999	0.07795	0.00076	1103	14	1084	24	1146	19		98.2774	94.5899
13/1-U-1, 292.22-292.50 m	#077	467	28	379	58	2270	390	1.3	3.986	0.041	0.283	0.0044	0.93999	0.10231	0.00078	1631.3	8.5	1606	22	1666	14		98.4491	96.3986
13/1-U-1, 292.22-292.50 m	#079	220	32	29	10	37	12	9.4	0.443	0.022	0.0592	0.0022	0.85871	0.0548	0.0015	378	19	371	13	402	61		98.1481	92.2886
13/1-U-1, 292.22-292.50 m	#086	408	51	232	89	1260	430	2.31	3.855	0.078	0.2809	0.0061	0.96197	0.09967	0.00062	1604	16	1596	31	1618	12		99.5012	98.6403
13/1-U-1, 292.22-292.50 m	#090	342	30	95	45	560	240	4.5	3.972	0.066	0.2856	0.0049	0.97101	0.10043	0.00016	1628	13	1619	25	1632	3		99.4472	99.2034
13/1-U-1, 292.22-292.50 m	#091	484	26	127.9	7.3	777	38	3.79	4.175	0.079	0.2889	0.0047	0.76943	0.1048	0.0013	1669	15	1636	23	1710	22		98.0228	95.6725
13/1-U-1, 292.22-292.50 m	#092	266	11	51.2	3.4	250	28	5.21	2.62	0.16	0.226	0.011	0.94338	0.0843	0.0015	1306	44	1311	57	1299	34		100.383	100.924
13/1-U-1, 292.22-292.50 m	#098	699	19	69	15	450	76	10.5	4.49	0.22	0.307	0.0082	0.87805	0.1057	0.0031	1728	42	1726	40	1725	55		99.8843	100.058
13/1-U-1, 292.22-292.50 m	#103	202	21	107	12	553	41	1.87	3.289	0.078	0.2532	0.0033	0.278	0.0939	0.0023	1478	19	1455	17	1505	46		98.4438	96.6777
13/1-U-1, 292.22-292.50 m	#105	450	45	157	21	970	100	2.788	4.158	0.068	0.2945	0.0057	0.81486	0.1012	0.0011	1666	14	1664	28	1647	21		99.88	101.032
13/1-U-1, 292.22-292.50 m	#111	365	40	74	7.2	380	16	4.613	2.382	0.042	0.2152	0.0039	0.91039	0.08049	0.00059	1237	13	1256	20	1209	15		101.536	103.888
13/1-U-1, 292.22-292.50 m	#113	210	26	54.3	7.5	380	34	3.87	4.326	0.044	0.3082	0.0021	0.7554	0.1011	0.001	1698.2	8.4	1732	10	1649	20		101.99	105.033
13/1-U-1, 292.22-292.50 m	#115	272	11	90.5	2	585	21	3.002	4.126	0.061	0.2977	0.0073	0.89066	0.0992	0.0011	1659	12	1679	36	1609	21		101.206	104.351
13/1-U-1, 292.22-292.50 m	#116	341	35	139	25	1020	190	2.52	4.305	0.064	0.306	0.0041	0.48175	0.1024	0.0015	1694	12	1721	20	1667	27		101.594	103.239
13/1-U-1, 292.22-292.50 m	#117	222	19	66.5	5.6	314	22	3.35	2.224	0.056	0.2053	0.0053	0.48246	0.0791	0.0012	1188	18	1204	28	1172	31		101.347	102.73
13/1-U-1, 292.22-292.50 m	#118	471	10	128.6	6.3	907	37	3.631	4.754	0.079	0.3148	0.0039	0.49645	0.1098	0.0012	1777	14	1764	19	1795	20		99.2684	98.273
13/1-U-1, 292.22-292.50 m	#124	152	11	75.4	5.6	431	18	2.036	3.99	0.12	0.294	0.01	0.98355	0.09829	0.00062	1633	25	1660	50	1592	12		101.653	104.271
13/1-U-1, 292.22-292.50 m	#125	830	140	229.3	9.4	949	50	3.56	1.775	0.056	0.176	0.0061	0.96942	0.07296	0.00065	1036	20	1045	34	1012	18		100.869	103.261
13/1-U-1, 292.22-292.50 m	#126	285	28	70	11	327	41	4.33	3.643	0.06	0.2694	0.0083	0.94078	0.0971	0.0014	1559	13	1537	42	1570	27		98.5888	97.8981
13/1-U-1, 292.22-292.50 m	#127	589	91	296	55	1780	320	2.025	4.227	0.057	0.2961	0.0021	0.85574	0.1031	0.0018	1679	11	1672	10	1681	32		99.5831	99.4646
13/1-U-1, 292.22-292.50 m	#130	250.1	8.5	100.3	6.1	638	57	2.529	3.777	0.076	0.2738	0.0078	0.90026	0.1002	0.001	1588	16	1560	40	1627	18		98.2368	95.882
13/1-U-1, 292.22-292.50 m	#131	210	23	143	34	940	150	1.54	4.448	0.092	0.3154	0.0089	0.96012	0.1018	0.0014	1721	17	1767	44	1658	26		102.673	106.574
13/1-U-1, 292.22-292.50 m	#137	349	80	90	31	490	130	4.13	3.21	0.21	0.253	0.014	0.93505	0.0915	0.0022	1457	52	1452	74	1456	45		99.6568	99.7253
13/1-U-1, 292.22-292.50 m	#138	252	10	105.3	5.1	185.1	4	2.38	0.593	0.014	0.0762	0.0019	0.34018	0.0569	0.0011	472.7	9.3	473	11	486	41		100.063	97.3251
13/1-U-1, 292.22-292.50 m	#139	258	69	142	60	900	380	1.93	4.003	0.093	0.2827	0.0066	0.57692	0.1022	0.0023	1635	19	1605	33	1663	41		98.1651	96.5123
13/1-U-1, 292.22-292.50 m	#143	423	33	103.3	7.9	598	30	4.049	3.207	0.061	0.2527	0.0046	0.92779	0.09172	0.00082	1458	15	1452	24	1461	17		99.5885	99.384
13/1-U-1, 292.22-292.50 m	#144	203	15	76.7	8.8	505	48	2.61	4.27	0.11	0.2992	0.0076	0.85148	0.1018	0.0016	1687	21	1687	38	1656	28		100	101.872
13/1-U-1, 292.22-292.50 m	#150	345	23	55.2	7.6	346	43	6.34	3.558	0.098	0.2714	0.0058	0.92434	0.0953	0.0013	1540	22	1548	30	1534	26		100.519	100.913
13/1-U-1, 292.22-292.50 m	#153	116	15	62.9	8	372	18	1.837	4.25	0.19	0.301	0.016	0.8631	0.1022	0.0028	1682	36	1694	81	1683	35		100.713	100.654
13/1-U-1, 292.22-292.50 m	#154	139	19	42.4	7.9	258	51	3.24	3.69	0.051	0.2732	0.0038	0.64716	0.0977	0.0012	1569	11	1557	19	1580	24		99.2352	98.5443
13/1-U-1, 292.22-292.50 m	#164	179	18	46	5.2	213	28	3.86	2.336	0.044	0.2111	0.0031	0.89304	0.0801	0.0013	1223	13	1235	17	1200	32		100.981	102.917
13/1-U-1, 292.22-292.50 m	#166	355	19	56	3.3	354	34	6.269	3.395	0.056	0.2641	0.0015	0.4826	0.0938	0.002	1503	13	1510.7	7.7	1504	39		100.512	100.445
13/1-U-1, 292.22-292.50 m	#167	222	29	61.8	9	382	73	3.56	3.788	0.075	0.2821	0.0028	0.94424	0.0979	0.0015	1590	16	1602	14	1584	28		100.755	101.136
13/1-U-1, 292.22-292.50 m	#168	429	81	119	34	690	190	4.32	3.291	0.063	0.2602	0.0033	0.75028	0.09233	0.00072	1479	15	1491	17	1474	15		100.811	101.153
13/1-U-1, 292.22-292.50 m	#169	308	23	70.9	4	410	29	4.377	3.447	0.045	0.2653	0.0034	0.84338	0.09421	0.00076	1515	10	1517	18	1512	15		100.132	100.331
13/1-U-1, 292.22-292.50 m	#170	346	15	143	10	674	43	2.51	2.468	0.042	0.2171	0.0038	0.86973	0.08289	0.00075	1262	12	1266	20	1266	18		100.317	100
13/1-U-1, 292.22-292.50 m	#176	816	93	15.5	1.4	39.2	3.2	52.7	1.802	0.042	0.1701	0.002	0.52137	0.0774	0.0014	1046	15	1013	11	1132	37		96.8451	89.4876
13/1-U-1, 292.22-292.50 m	#178	375	47	101	22	740	220	3.76	4.11	0.3	0.2923	0.0037	0.18522	0.1026	0.0086	1655	57	1653	18	1660	140		99.8792	99.5783
13/1-U-1, 292.22-292.50 m	#181	1410	110	322	48	4120	540	4.39	28.2	1.4	0.701	0.013	0.99368	0.2925	0.0086	3426	47	3423	49	3430	46		99.9124	99.7959
13/1-U-1, 292.22-292.50 m	#190	595	60	156	20	574	59	3.78	1.828	0.058	0.178	0.0059	0.93559	0.07473	0.00095	1055	20	1056	32	1061	26		100.095	99.5287
13/1-U-1, 292.22-292.50 m	#191	580	120	224	52	1170	270	2.61	3.84	0.1	0.2867	0.0053	0.92925	0.0974	0.0012	1601	22	1625	26	1584	19		101.499	102.588
13/1-U-1, 292.22-292.50 m	#196	638	55	156	13	649	49	4.022	2.207	0.052	0.2018	0.0027	0.98857	0.07926	0.00093	1183	16	1185	14	1179	23		100.169	100.509
13/1-U-1, 292.22-292.50 m	#203	648	38	92.9	6.2	386	27	6.881	1.806	0.014	0.1794	0.0011	0.39713	0.07319	0.00051	1047.6	5.2	1063.9	6.2	1019	14		101.556	104.406
13/1-U-1, 292.22-292.50 m	#205	237	22	33.4	3.6	190	14	7.04	3.301	0.089	0.259	0.0025	0.75337	0.0922	0.0019	1481	21	1485	13	1471	39		100.27	100.952
13/1-U-1, 292.22-292.50 m	#206	836	64	449	16	2610	74	1.839	4.213	0.05	0.2957	0.0039	0.90115	0.103	0.001	1676.4	9.7	1670	19	1678	18		99.6182	99.5232
13/1-U-1, 292.22-292.50 m	#207	471	44	104.3	7.4	465	40	4.47	2.228	0.026	0.1991	0.0015	0.80839	0.08092	0.00087	1189.9	8.3	1170.4	8.3	1219	21		98.3612	96.0131
13/1-U-1, 292.22-292.50 m	#208	106	27	104	35	101	30	1.038	0.431	0.041	0.0477	0.001	0.63929	0.0652	0.0061	363	29	300.6	6.4	770	190		82.8099	39.039
13/1-U-1, 292.22-292.50 m	#209	232	49	70	18	317	62	3.38	2.516	0.043	0.2236	0.004	0.6172	0.0814	0.0017	1277	12	1301	21	1229	40		101.879	105.858
13/1-U-1, 292.22-292.50 m	#100	1180	140	106.5	6	707	50	11.1	2.9	0.11	0.2172	0.0064	0.96979	0.0964	0.0011	1380	29	1267	34	1555	22	X	91.8116	81.4791
13/1-U-1, 292.22-292.50 m	#183	664	81	206	11	1200	80	3.18	3.89	0.068	0.2673	0.0032	0.64487	0.105	0.0017	1611	14	1527	16	1713	30	X	94.7858	89.1419
13/1-U-1, 292.22-292.50 m	#202	2050	400	105	13	404	34	20	1.334	0.041	0.1374	0.003	0.96803	0.07028	0.00094	860	18	830	17	936	28	X	96.5116	88.6752
aU, Th and Pb concentrations with errors (2SE) and U/Th ratios are calculated relative to the GJ-1 reference zircon
bCorrected for background, downhole and within-run Pb/U fractionation. Normalised to the reference zircon GJ-1 (TIMS/measured values). The 207Pb/235U is calculated through: (207Pb/206Pb)/(238U/206Pb * 1/137.88)
cRho is the error correlation defined as the quotient of the propagated errors of the 206Pb/238U and 207/235U ratios
dQuadratic addition of within-run errors (2 SE) and the all-session reproducibility of GJ-1 (2 SE)
eNormalised to the GJ-1 reference zircon (~0.6 per atomic mass unit)
fCommon Pb correction through measured Pb204 (corrected for Hg204 using natural abundance Hg isotopic ratios) and the model Pb composition of Stacey & Kramers (1975)
